# Supplementary material for: Collective and Augmented Intelligence Outperform Artificial Intelligence on Emotion Recognition Tests
Source: Research Square preprint supplement (doi:10.21203/rs.3.rs-7538602/v1), 2025-09-16
Supplement: Supplementary file 1 [file 62f929f7bec4f071909a97e3.docx]

# Supplementary Materials

## Table S1. Estimated Contrast Results for Zero and 10-Shot Conditions

| **Dataset** | **Contrast** | **Odds Ratio** | **SE** | **z-ratio** | **p-value** |
| --- | --- | --- | --- | --- | --- |
| RMET | Human vs Zero-Shot | 0.32 | 0.04 | -9.88 | < 0.0001 |
|  | Human vs 10-Shot | 0.24 | 0.03 | -11.67 | < 0.0001 |
|  | ***Zero-Shot vs 10-Shot*** | ***0.76*** | ***0.13*** | ***-1.61*** | ***0.32*** |
| MRMET | Human vs Zero-Shot | 0.38 | 0.04 | -9.45 | < 0.0001 |
|  | Human vs 10-Shot | 0.29 | 0.03 | -11.77 | < 0.0001 |
|  | ***Zero-Shot vs 10-Shot*** | ***0.76*** | ***0.11*** | ***-1.86*** | ***0.19*** |

**Note.** RMET = Reading the Mind in the Eyes Test; MRMET = Multiracial Reading the Mind in the Eyes Test. All estimates are derived from a logistic mixed-effects model using the lme4 package. Contrasts represent pairwise comparisons between conditions, where SE = Standard Error. Marginal means are estimated using the emmeans package. For contrast analyses, p-values are adjusted using Bonferroni correction for multiple comparisons within each dataset (three comparisons per dataset, α = 0.05). Odds ratios less than 1.00 indicate lower odds in the first condition compared to the second condition (e.g., Human vs Zero-Shot = 0.32 means humans have 0.32 times the odds of correct responses compared to GPT-4o Zero-Shot).

## Table S2. Model Diagnostics and Comparison for Mixed-Effect Logistic Models (Pooled versus Unpooled Models)

| **Model Information** | **RMET** | | **MRMET** | |
| --- | --- | --- | --- | --- |
|  | **Pooled  GPT-4o** | **Unpooled  GPT-4o** | **Pooled  GPT-4o** | **Unpooled  GPT-4o** |
| **Model Fit Indices** |  |  |  |  |
| AIC | 729,232.50 | 729,231.70 | 395,826.00 | 395,824.30 |
| BIC | 729,277.90 | 729,288.50 | 395,869.00 | 395,878.10 |
| Log Likelihood | -364,612.20 | -364,610.80 | -197,909.00 | -197,907.20 |
| **Model Size** |  |  |  |  |
| Parameters | 4 | 5 | 4 | 5 |
| Observations | 640,080 | 640,080 | 347,615 | 347,615 |
| Number of Unique Observations (Participants + AI) | 17,780 | 17,780 | 9,395 | 9,395 |
| Items | 36 | 36 | 37 | 37 |
| **Model Comparison** |  |  |  |  |
| χ² | 2.79 | - | 3.64 | - |
| df | 1 | - | 1 | - |
| p-value | 0.095 | - | 0.057 | - |

**Note.** RMET = Reading the Mind in the Eyes Test; MRMET = Multiracial Reading the Mind in the Eyes Test. The Pooled model treats all GPT-4o conditions as a single group, while the Unpooled model separates zero-shot and 10-shot conditions. Model comparisons use likelihood ratio tests comparing Pooled to Unpooled models. AIC = Akaike Information Criterion; BIC = Bayesian Information Criterion. The use of the Pooled model is statistically justified by: (1) non-significant likelihood ratio tests for both RMET (χ²(1) = 2.79, p = 0.095) and MRMET (χ²(1) = 3.64, p = 0.057), indicating no significant loss of fit; (2) lower BIC values favoring the more parsimonious Pooled model; (3) minimal differences in AIC (ΔAIC < 2) suggesting comparable fit; and (4) increased statistical power through larger sample sizes per condition. All models include random intercepts for participants and items.

## Table S3. Mixed-Effects Logistic Regression Results for RMET and MRMET for Zero, 10-shot, and Human Conditions

| **Parameter** | **RMET** | | | **MRMET** | | |
| --- | --- | --- | --- | --- | --- | --- |
|  | Estimate | SE | p-value | Estimate | SE | p-value |
| **Fixed Effects** |  |  |  |  |  |  |
| (Intercept) | 0.96 | 0.08 | p < 0.001 | 0.69 | 0.15 | p < 0.001 |
| GPT-4o (Zero-shot) | 1.14 | 0.12 | p < 0.001 | 0.98 | 0.10 | p < 0.001 |
| GPT-4o (10-shot) | 1.41 | 0.12 | p < 0.001 | 1.26 | 0.11 | p < 0.001 |
| **Random Effects** |  |  |  |  |  |  |
| Respondent-Level Variance | 0.39 | - | - | 0.34 | - | - |
| Respondent-Level Std Dev | 0.63 | - | - | 0.59 | - | - |
| Item-Level Variance | 0.21 | - | - | 0.88 | - | - |
| Item-level Std Dev | 0.46 | - | - | 0.94 | - | - |

**Notes.** RMET = Reading the Mind in the Eyes Test; MRMET = Multiracial Reading the Mind in the Eyes Test. Both models were fit as generalized linear mixed models (GLMM) using the lme4 package in R, with a logit link function. Models were fit by maximum likelihood using adaptive Gauss-Hermite quadrature with crossed random intercepts for participant and item. Fixed effects estimates are presented on the log-odds scale. SE refers to standard error. Human performance serves as the reference group for all comparisons (Intercept). Random effects are reported as variances and their standard deviations, representing the unexplained variation at the participant and item levels. Both models showed successful convergence with no warnings or errors.

## Table S4. Stochastic Dominance Test Results for RMET and MRMET Datasets

| **Dataset** | **Order** | **Null Hypothesis (H₀)** | **Tobs** | **p-value** | **Decision** |
| --- | --- | --- | --- | --- | --- |
| **RMET** | First-Order | Human dominates GPT-4o (Pooled) | 10.29 | p < 0.001 | Reject |
|  |  | GPT-4o (Pooled) dominates Human | 0.01 | 0.89 | Fail to reject |
|  |  |  |  |  |  |
|  | Second-Order | Human dominates GPT-4o (Pooled) | 184.77 | p < 0.001 | Reject |
|  |  | GPT-4o (Pooled) dominates Human | 0.00 | 0.91 | Fail to reject |
|  |  |  |  |  |  |
|  |  |  |  |  |  |
| **MRMET** | First-Order | Human dominates GPT-4o (Pooled) | 7.934 | p < 0.001 | Reject |
|  |  | GPT-4o (Pooled) dominates Human | 0.013 | 0.86 | Fail to reject |
|  |  |  |  |  |  |
|  | Second-Order | Human dominates GPT-4o (Pooled) | 69.939 | p < 0.001 | Reject |
|  |  | GPT-4o (Pooled) dominates Human | 0.00 | 0.88 | Fail to reject |

**Note.** RMET = Reading the Mind in the Eyes Test; MRMET = Multiracial Reading the Mind in the Eyes Test. This table presents results from bootstrap (N = 2000) tests of stochastic dominance comparing Human and GPT-4o (Pooled) performance distributions for both datasets. Stochastic dominance tests examine whether one distribution systematically outperforms another across its entire range. First-order dominance indicates superior performance at every level of the distribution, while second-order dominance indicates superior performance in terms of cumulative probabilities. Tobs represents the bootstrapped test statistic, with positive values indicating evidence against the null hypothesis. For both orders, we tested two null hypotheses: (1) Human performance dominates GPT-4o performance, and (2) GPT-4o performance dominates Human performance. The results show that we reject the hypothesis of Human dominance over GPT-4o (both first- and second-order) for both RMET and MRMET tasks, but fail to reject GPT-4o dominance over Human performance, providing evidence that GPT-4o performance stochastically dominates Human performance in both tasks. This dominance indicates that GPT-4o consistently outperforms humans across the entire distribution of scores. All tests were conducted at α = 0.05 significance level, with rejection of the null hypothesis indicating the absence of stochastic dominance.

## Table S5. Aggregated Accuracy Through Plurality Voting for RMET Dataset

| **Condition** | **Aggregation Size** | **Accuracy** | **SD** | **n** |
| --- | --- | --- | --- | --- |
| GPT-4o | (individual level) | 0.90 | 0.31 | 200 |
|  | 5 | 0.92 | 0.28 | 200 |
|  | 10 | 0.92 | 0.26 | 200 |
|  | 20 | 0.93 | 0.26 | 200 |
|  | 30 | 0.93 | 0.26 | 200 |
|  | 40 | 0.92 | 0.26 | 200 |
|  | 50 | 0.93 | 0.26 | 200 |
|  | 60 | 0.92 | 0.26 | 200 |
|  | 70 | 0.93 | 0.26 | 200 |
|  | 80 | 0.93 | 0.26 | 200 |
|  | 90 | 0.93 | 0.26 | 200 |
| Human | (individual level) | 0.71 | 0.46 | 200 |
|  | 5 | 0.93 | 0.25 | 200 |
|  | 10 | 0.97 | 0.16 | 200 |
|  | 20 | 0.99 | 0.09 | 200 |
|  | 30 | 1.00 | 0.06 | 200 |
|  | 40 | 1.00 | 0.03 | 200 |
|  | 50 | 1.00 | 0.03 | 200 |
|  | 60 | 1.00 | 0.02 | 200 |
|  | 70 | 1.00 | 0.02 | 200 |
|  | 80 | 1.00 | 0.00 | 200 |
|  | 90 | 1.00 | 0.00 | 200 |
| Human + GPT-4o | (individual level) | 0.71 | 0.46 | 200 |
|  | 5 | 0.94 | 0.24 | 200 |
|  | 10 | 0.98 | 0.14 | 200 |
|  | 20 | 0.99 | 0.07 | 200 |
|  | 30 | 1.00 | 0.04 | 200 |
|  | 40 | 1.00 | 0.04 | 200 |
|  | 50 | 1.00 | 0.02 | 200 |
|  | 60 | 1.00 | 0.00 | 200 |
|  | 70 | 1.00 | 0.00 | 200 |
|  | 80 | 1.00 | 0.00 | 200 |
|  | 90 | 1.00 | 0.00 | 200 |

**Note.** RMET = Reading the Mind in the Eyes Test. Results represent aggregated accuracy through plurality voting across different sample sizes. This table presents the accuracy of aggregated decisions for three conditions: GPT-4o, Human, and Augmented Intelligence (Combined Human + GPT-4o). Aggregation Size represents the number of individual responses aggregated for each decision. Accuracy indicates the proportion of correct responses after plurality voting, SD represents the standard deviation of accuracy scores, and n indicates the number of bootstrap iterations samples. Results show that larger aggregation sizes generally lead to improved accuracy, with both Human and Human + GPT-4o conditions achieving perfect accuracy at larger sizes, while GPT-4o shows more modest improvements with increased aggregation.

## Table S6. Decision Accuracy Through Plurality Rule for MRMET Dataset

| **Condition** | **Aggregation Size** | **Accuracy** | **SD** | **n** |
| --- | --- | --- | --- | --- |
| GPT-4o | (individual level) | 0.83 | 0.38 | 200 |
|  | 5 | 0.84 | 0.37 | 200 |
|  | 10 | 0.84 | 0.37 | 200 |
|  | 20 | 0.83 | 0.37 | 200 |
|  | 30 | 0.83 | 0.38 | 200 |
|  | 40 | 0.83 | 0.38 | 200 |
|  | 50 | 0.83 | 0.38 | 200 |
|  | 60 | 0.83 | 0.38 | 200 |
|  | 70 | 0.83 | 0.38 | 200 |
|  | 80 | 0.82 | 0.38 | 200 |
|  | 90 | 0.82 | 0.38 | 200 |
| Human | (individual level) | 0.62 | 0.48 | 200 |
|  | 5 | 0.83 | 0.37 | 200 |
|  | 10 | 0.87 | 0.34 | 200 |
|  | 20 | 0.90 | 0.31 | 200 |
|  | 30 | 0.90 | 0.30 | 200 |
|  | 40 | 0.91 | 0.28 | 200 |
|  | 50 | 0.92 | 0.28 | 200 |
|  | 60 | 0.92 | 0.27 | 200 |
|  | 70 | 0.92 | 0.28 | 200 |
|  | 80 | 0.92 | 0.27 | 200 |
|  | 90 | 0.92 | 0.27 | 200 |
| Human + GPT-4o | (individual level) | 0.66 | 0.47 | 200 |
|  | 5 | 0.84 | 0.37 | 200 |
|  | 10 | 0.88 | 0.33 | 200 |
|  | 20 | 0.91 | 0.28 | 200 |
|  | 30 | 0.92 | 0.27 | 200 |
|  | 40 | 0.93 | 0.25 | 200 |
|  | 50 | 0.94 | 0.25 | 200 |
|  | 60 | 0.94 | 0.24 | 200 |
|  | 70 | 0.94 | 0.24 | 200 |
|  | 80 | 0.94 | 0.23 | 200 |
|  | 90 | 0.95 | 0.22 | 200 |

**Note.** MRMET = Multiracial Reading the Mind in the Eyes Test. Results represent aggregated decisions through the plurality voting across different sample sizes. This table presents the accuracy of aggregated decisions for three conditions: GPT-4o, Human, and Augmented Intelligence (Combined Human + GPT-4o). Aggregation Size represents the number of individual responses aggregated for each decision as a group. Accuracy indicates the proportion of correct responses after plurality voting, SD represents the standard deviation of accuracy scores, and n indicates the number of bootstrap iterations samples. Results show that larger aggregation sizes generally lead to improved accuracy, with both Human and Human + GPT-4o conditions achieving perfect accuracy at larger sizes, while GPT-4o shows more modest improvements with increased aggregation.

## Table S7. Slope Analysis Results for Log₁₀ Group Size Effects Across Conditions

|  | **Slope** | **SE** | **95% CI Lower** | **95% CI Upper** |
| --- | --- | --- | --- | --- |
| **RMET** |  |  |  |  |
| Human-Crowd | 3.99 | 0.06 | 3.87 | 4.10 |
| GPT-4o-Crowd | 0.25 | 0.03 | 0.19 | 0.32 |
| Augmented Intelligence | 4.23 | 0.05 | 4.13 | 4.34 |
| **MRMET** |  |  |  |  |
| Human-Crowd | 1.42 | 0.03 | 1.37 | 1.47 |
| GPT-4o-Crowd | -0.04 | 0.03 | -0.09 | 0.01 |
| Augmented Intelligence | 1.59 | 0.02 | 1.55 | 1.64 |

**Note.** RMET = Reading the Mind in the Eyes Test; MRMET = Multiracial Reading the Mind in the Eyes Test. Augmented intelligence (Human + GPT-4o conditions) refers to the combination of both Human and GPT-4o sampled responses. Slope values represent the estimated slopes of accuracy improvement as a function of Log₁₀ Group Size for each condition. SE = Standard Error; CI = Confidence Interval. Confidence intervals are asymptotic at a 95% confidence level. Positive slopes indicate improved accuracy with increased group sizes, while values near zero indicate minimal group size effects. For RMET, all conditions show positive slopes, with Human and Augmented intelligence conditions showing substantially stronger effects than GPT-4o alone. For MRMET, Human and Augmented intelligence conditions show positive slopes, while GPT-4o shows no significant trend (confidence interval includes zero). The Augmented intelligence condition demonstrates the strongest positive slope in both datasets, suggesting enhanced benefits from aggregation in the combined condition.
